# Supplementary material for: Genetic Variation Near the Hepatocyte Nuclear Factor-4α Gene Predicts Susceptibility to Type 2 Diabetes
Source: Oxford University Press journal article supplement (doi:10.2337/diabetes.53.4.1141), 2004-04-01
Supplement: 1141-sup-0997_appendix_table1.xls [file 1141-sup-0997_appendix_table1.xls]

## Sheet: App_Table1
APPENDIX TABLE 1
Variants identified in the P2 promoter region of HNF4A
kb position*	SNP name	dbSNP ID	Reference	Variant	Frequency†
-2.098	HNF4A_1	rs6031544	C	T	0.27
-2.076	HNF4A_2	ss15737880	C	T	0.01
-1.415	HNF4A_3		G	A	<.05
-1.413	HNF4A_4		T	C	<.05
-1.323	HNF4A_5	ss15737881	G	C	0.1
-1.31	HNF4A_6	ss15737882	A	G	0.1
-1.232	HNF4A_7	ss15737883	T	C	0.1
-0.858	HNF4A_8	ss15737884	C	T	0.1
*kb position from the HNF4A P2 promoter translation initiation site
at chromosome 20, base position 43,669,874 of the human reference
sequence (UCSC Genome Browser, July 2003)
†Based on genotyping of ~400 Finnish control individuals, except for
HNF4A_3 and HNF4A_4 which are estimated from dHPLC variant
screening of 23 individuals
